# Supplementary material for: Synthesis and characterization of polyaniline, polypyrrole and zero-valent iron-based materials for the adsorptive and oxidative removal of bisphenol-A from aqueous solution
Source: Royal Society of Chemistry journal article supplement (doi:10.1039/c9ra01666j), 2019-01-01
Supplement: c9ra01666j1.pdf [file c9ra01666j1.pdf]

Supporting information

**Synthesis and characterization of polyaniline, polypyrrole and zero-valent iron-based materials for the adsorptive and oxidative removal of bisphenol A from aqueous solution.**

Lerato Hlekelele, Nomvuyo E. Nomadolo, Katlego Z. Setshedi, Lethula E. Mofokeng, Avashnee Chetty, and Vongani P. Chauke \*

*Polymers and Composites, Materials Science and Manufacturing, Council for Scientific and Industrial Research (CSIR), Pretoria, South Africa*

\*VChauke@csir.co.za

(S1)

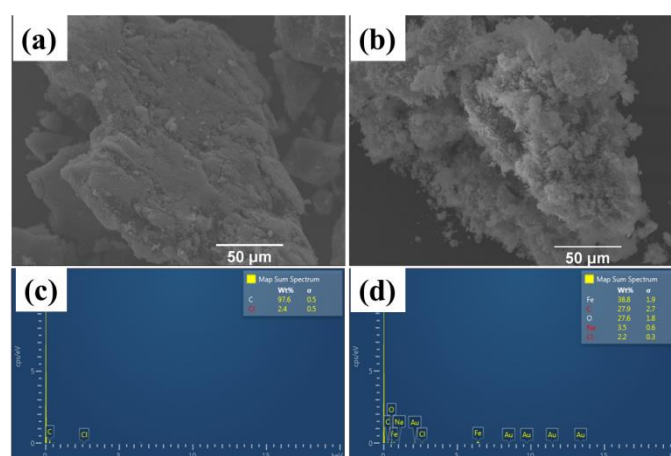

**Fig. S1** SEM images (at 500x magnification) of (a) PPY/PANI and (b) Fe<sup>0</sup>-PPY/PANI and EDS spectrum of (c) PPY/PANI and (d) Fe<sup>0</sup>-PPY/PANI

(S2)

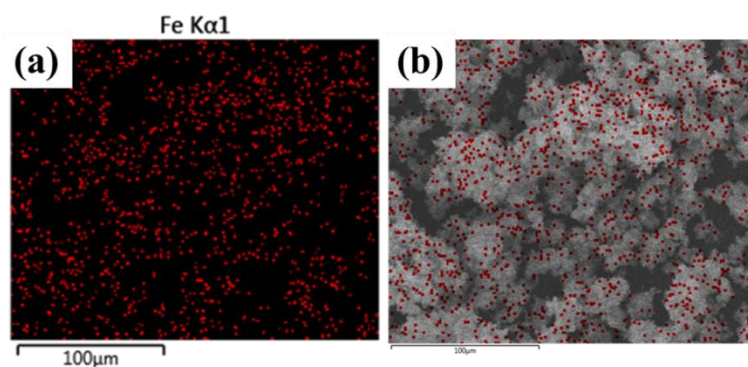

**Fig. S2** (a) EDS mapping of Fe and (b) a layered image showing the distribution of Fe<sup>0</sup> nanoparticles on the surface of PPY

(S3)

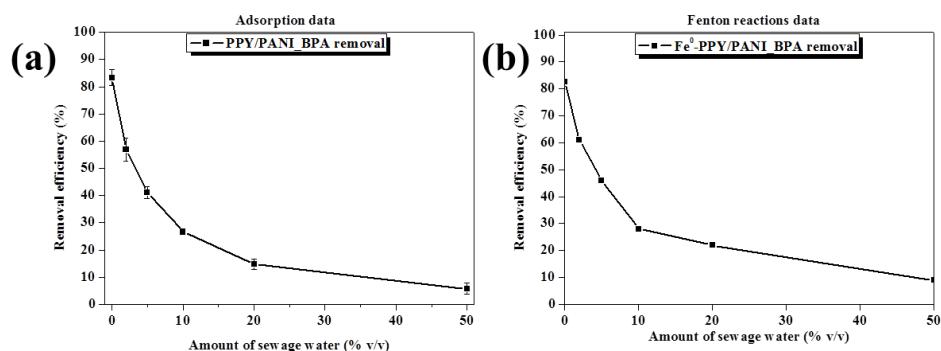

**Fig. S3.** The removal efficiency of BPA in the presence of various concentrations of sewage water by (a) adsorption using PPY/PANI and (b) Fenton-reaction using Fe<sup>0</sup>-PPY-PANI. Experimental conditions: 200 ml of 50 ppm BPA, pH 6 for a adsorption experiments and pH 3 for Fenton reactions and 100 mg of adsorbent or Fenton catalyst and 15 ppm H<sub>2</sub>O<sub>2</sub> for only Fenton reaction.

(S4)

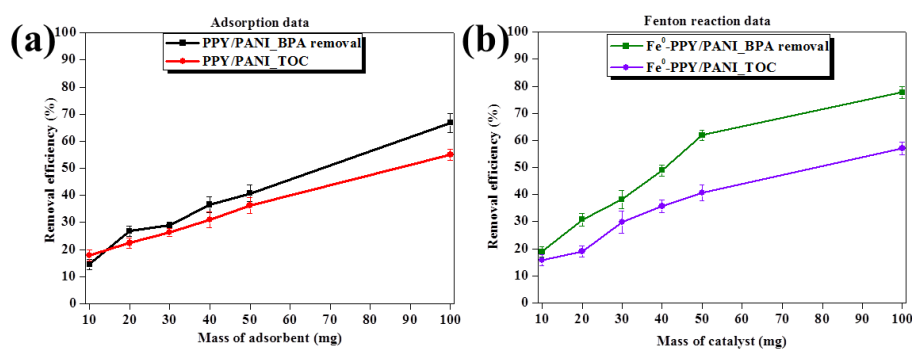

**Fig. S4.** Effect of the mass of (a) adsorbent and (b) Fenton catalyst on the removal of BPA and total organic content. Experimental conditions: 200 ml of 50 ppm BPA, pH 6 for a adsorption experiments and pH 3 for Fenton reactions and 25 % sewage-water.

(S5)

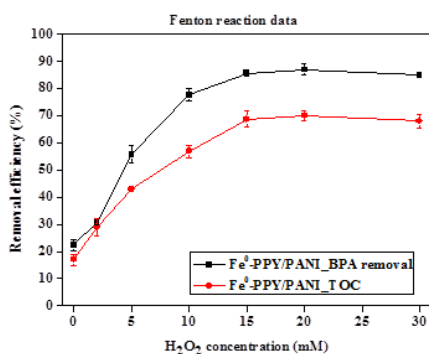

**Fig. S5.** The effect that the concentration of H<sub>2</sub>O<sub>2</sub> had on the removal efficiency of BPA and TOC by Fenton reaction using Fe<sup>0</sup>-PPY/PANI.

(S6)

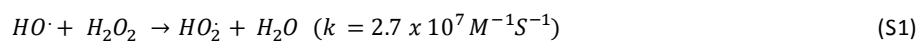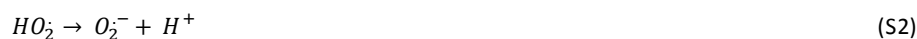

(S7)

Table S1 Thermodynamic parameters that describe the adsorption of BPA onto PPY/PANI

| t (K) | $\Delta G^\circ$ (kJ mol <sup>-1</sup> ) | $\Delta H^\circ$ (kJ mol <sup>-1</sup> ) | $\Delta S^\circ$ (J K <sup>-1</sup> mol <sup>-1</sup> ) |
|-------|------------------------------------------|------------------------------------------|---------------------------------------------------------|
| 298   | 0.418                                    | -3.50                                    | 0.012                                                   |
| 308   | -0.640                                   |                                          |                                                         |
| 318   | -1.50                                    |                                          |                                                         |

(S8)

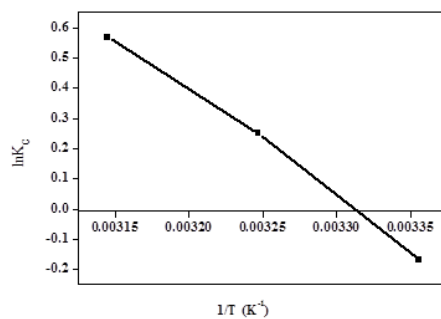

Fig. S6 Plot of  $\ln K_c$  vs  $1/T$  for the estimation of the thermodynamic parameters for the adsorption of BPA onto PPY/PANI.

(S9)

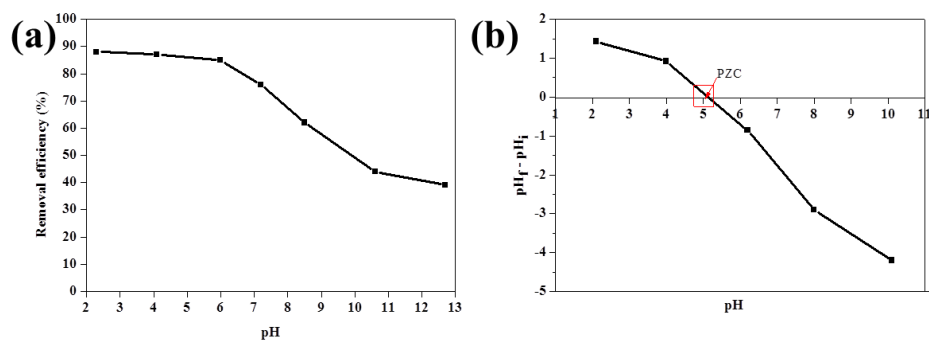

Fig. S7 (a) Effect of pH on the adsorption of BPA onto PPY/PANI and (b) plot of pH point of zero charge of PPY/PANI.

(S10)

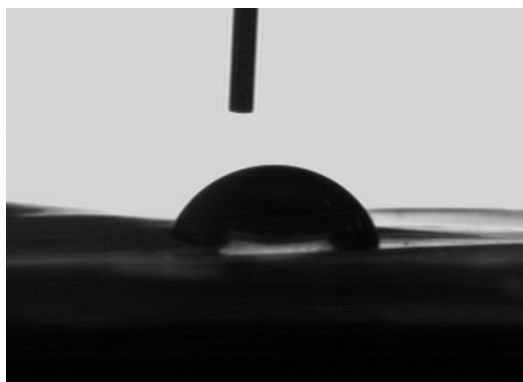

Fig. S8 representative image of a water droplet (pH 6) on PPY/PANI powder.

(S11)

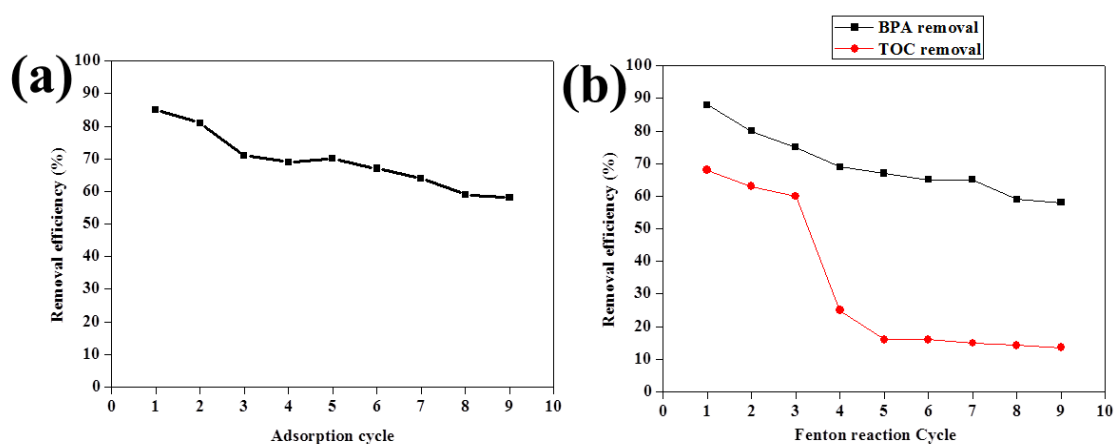

Fig. S9 The removal efficiency of BPA using (a) PPY/PANI as an adsorbent and (b) Fe<sup>0</sup>-PPY/PANI as a catalyst for the activation of 15 ppm H<sub>2</sub>O<sub>2</sub>. Experimental conditions: 200 ml of 50 ppm BPA, pH 6 for adsorption experiments and pH 3 for Fenton reactions, 100 mg of adsorbent or Fenton catalyst.

The recyclability of PPY/PANI as an adsorbent and Fe<sup>0</sup>-PPY/PANI as a Fenton reaction catalyst were investigated by using the material over 9 cycles (Fig. S7). The adsorbent, PPY/PANI was regenerated after every adsorption by filtering off the remaining BPA solution from the previous experiment, drying the material at 80 °C overnight followed by washing the material with methanol (desorbing BPA from the material with methanol). The desorption of BPA from PPY/PANI was done by putting the material in 50 ml methanol followed by shaking the suspension for 48 hours on an orbital shaker. The removal efficiency of PPY/PANI decreased slightly over 9 cycles (Fig. S9a). On the 9<sup>th</sup> cycle, the removal efficiency was only 32 % less than the removal efficiency that was absorbed on the 1<sup>st</sup> cycle.

A different regeneration process was used for the regeneration of Fe<sup>0</sup>-PPY/PANI. Here, after each BPA removal experiment, the remaining BPA solution was filtered off and the catalyst was dried at 80 °C in a vacuum oven. The dried catalyst was then dispersed in a 0.75 M methanolic NaBH<sub>4</sub> solution. This solution was shaken on an orbital shaker whilst being bubbled using a slow flowing stream of nitrogen gas. Here, it was also observed that the removal efficiency of the material remained high over 9 cycles (Fig. S9b). It was found that the removal efficiency decreased from 88 % to 58 by the 9<sup>th</sup> cycle. A different behavior was observed when studying the TOC removal efficiency. It was observed that the TOC efficiency decreased slightly between the 1<sup>st</sup> and 3<sup>rd</sup> cycle followed by a drastic drop in efficiency on the 4<sup>th</sup> cycle which remained constant until the 9<sup>th</sup> cycle. This happened because Fe<sup>0</sup> was being slowly leached from the composite between the 1<sup>st</sup> and the 3<sup>rd</sup> cycle and most of it was lost by the 4<sup>th</sup> cycle. Therefore, from the 4<sup>th</sup> cycle, the material behaved as an adsorbent rather than a Fenton reaction catalyst hence the relatively high BPA removal efficiency but the low mineralization efficiency.
